# Supplementary material
Source: Springer Nature journal article supplement (https://www.springermedizin.de/resource/supplementary/12885_2007_970_MOESM1_ESM.pdf/9471558)

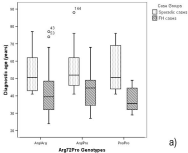

a)

Supplement: MOESM1 [file 9471558]
